# Supplementary material
Source: publisher figshare collection journal article supplement (https://karger.figshare.com/ndownloader/files/8260595)
Supplement: Supplementary file 1 [file 8260595]

Table S2. Average recorded temperature and a number of hatchlings as graphed in Figure 2.

| Cohort | I | II | III |
| --- | --- | --- | --- |

Average recorded temperature as graphed in Figure 2.

| During TSP (TSP) | 29.39 ˚C | 29.17 ˚C | 29.05 ˚C |
| --- | --- | --- | --- |
| An entire development (entire) | 29.35 ˚C | 29.16 ˚C | 29.30 ˚C |

Number (percentage) of hatchings as graphed in Figure 2.

| Male | 2/44 (4.6 %) | 4/22 (18.18 %) | 21/57 (36.84 %) |
| --- | --- | --- | --- |
| Female | 42/44 (95.45 %) | 18/22 (81.82%) | 36/57 (63.16 %) |
